# Supplementary material for: Multinational characterization of neurological phenotypes in patients hospitalized with COVID-19
Source: PubMed Central journal article supplement (PMC8510999; doi:10.1038/s41598-021-99481-9), 2021-10-12
Supplement: 41598_2021_99481_MOESM1_ESM.pdf [file 41598_2021_99481_MOESM1_ESM.pdf]

# Multinational Characterization of Neurological Phenotypes in Patients Hospitalized with COVID-19

|                       |     |
|-----------------------|-----|
| Supplementary Methods | 2   |
| Supplementary Results | 2-3 |
| eTable 1              | 4-5 |
| eTable 2              | 6-7 |
| eTable 3              | 8   |
| eFigure 1             | 9   |
| eFigure 2             | 10  |
| eFigure 3             | 11  |
| eFigure 4             | 12  |
| eFigure 5             | 13  |

## Supplemental Materials

### Supplementary Statistical Methods and Equations

For each neurological ICD code (3 alphanumeric characters), we reported the total count across all contributing healthcare systems and all countries ( $Y$ ) as well as the proportion of patients hospitalized with COVID-19 who had each ICD code at each healthcare system (and each country), both before admission ( $prop_{before}$ ) and after admission ( $prop_{after}$ ) (**eEq. 1**).

$$prop_{before}(X, Y) = \frac{\text{number of hospitalized COVID-19 positive cases diagnosed with } X \text{ at } Y \text{ before admission}}{\text{total number of hospitalized COVID-19 positive cases at site (or country) } Y} \text{ (eEq. 1a)}$$

$$prop_{after}(X, Y) = \frac{\text{number of hospitalized COVID-19 positive cases diagnosed with } X \text{ at } Y \text{ after admission}}{\text{total number of hospitalized COVID-19 positive cases at site (or country) } Y} \text{ (eEq. 1b)}$$

For each ICD code  $X$ , we calculated the difference in the proportion of cases with an ICD code  $X$  before and after COVID-19 hospitalization (**eEq. 2**) and used a paired two-sided t-test to examine whether there was a statistically significant difference when comparing the proportions after admission with proportions before admission across all contributing health systems (and countries).

$$\Delta prop(X, Y) = prop_{after}(X, Y) - prop_{before}(X, Y) \text{ (eEq. 2)}$$

We next compared the prevalence of each neurological ICD code (first three characters before decimal point) and disease category by contributing healthcare system, before and after admission date, between patients who ever met the 4CE criteria of severe COVID-19 (see main text) and those who did not. For each ICD code  $X$ , we computed the expected number of ever-severe patient cases  $s_{Ei}$  with:

$$s_{Ei} = \frac{m_X}{\sum_{X \in ICD_{neuro}} m_X} \times \sum_{X \in ICD_{neuro}} s_X \text{ (eEq. 3)}$$

where  $m_X$  denotes the observed number of never-severe patient cases with code  $X$ , and  $s_X$  denotes the observed number of ever-severe patient cases with code  $X$  (**eEq. 3**). Consequently,  $\sum_{X \in ICD_{neuro}} s_X$  represents the total number of patients with ever-severe status, and  $m_X / \sum_{X \in ICD_{neuro}} m_X$  represents the proportion of patients without severe disease but with neurological code  $X$ . We then performed an enrichment analysis to examine the difference in proportions of ever-severe disease across neurological ICD codes. Specifically, we calculated the enrichment of each neurological ICD code by dividing the observed number of severe cases by the expected number of severe cases and reported a value of  $\log_2$  enrichment (LOE) and its 95% confidence interval (**eEq. 4**).

$$LOE = \log_2 \frac{s_i}{s_{Ei}} \text{ (eEq. 4)}$$

We estimated the 95% confidence interval of the LOE using the Poisson model method. Finally, we computed the  $p$  values using Fisher's exact test and corrected for multiple hypothesis testing with Benjamini-Hochberg's false discovery rate (FDR) procedure. We considered a result with  $p_{FDR} < 0.05$  statistically significant.

### Exploratory Analysis of ICD-9 Data

We analyzed separately the neurological phenotypes among the subset of the patients with ICD-9 codes (**eTable 2**), as a minority of the 4CE contributing healthcare systems in the USA (7 healthcare systems partially submitting ICD-9 codes related to procedure-related ICD-9 codes) and Italy (5 healthcare systems exclusively submitting ICD-9 codes) reported

neurological ICD-9 codes (**eTable 3**). Because 7 of these contributing healthcare systems reported both ICD-9 and ICD-10 data and given the aggregate data format, we could not ascertain the exact number of patients with ICD-9 data. We separated this analysis from the main ICD-10 analysis because one-to-one mapping from ICD-9 to ICD-10 codes was not available for all codes.

As with the ICD-10 data, there was increased prevalence of “disorders of consciousness and other neurological conditions” in patients after admission date when compared to before admission date (**eFig. 2, eFig. 3**). These differences appear to be driven by the contributing healthcare systems in the USA. However, there was no statistically significant difference when examining the change in prevalence of individual neurological conditions after admission date. The smaller sample size might explain the difference from the ICD-10 data results.

Using the patients who never experienced severe disease as the reference control, in the period after admission date, we found a significantly higher proportion of patients with severe disease to have three broad categorical ICD-9 codes (**eFig. 4**): (1) “other conditions of the brain” (ICD-9 348, which broadly includes “cerebral cysts”, “anoxic brain damage”, “benign intracranial hypertension”, “encephalopathy, not elsewhere classified”, “compression of brain”, “cerebral edema”: relative risk difference  $RRD_{after}=55\%$ ); (2) “general symptoms” (ICD-9 780, which broadly includes “altered consciousness”, “hallucination”, “syncope and collapse”, “convulsions”, “dizziness and giddiness”, “sleep disturbance”, “fever and other physiologic disturbances of temperature regulation”, “malaise and fatigue”:  $RRD_{after}=33\%$ ); (3) “other ill-defined and unknown causes of morbidity and mortality” (ICD-9 799, which broadly includes “asphyxia and hypoxemia”, “respiratory arrest”, “nervousness”, “debility, unspecified”, “cachexia”, “signs and symptoms involving cognition”:  $RRD_{after}=42\%$ ). Given the broad definition of these three categorical ICD-9 codes (348, 780, 799), a direct comparison with the ICD-10 data was not feasible and supported the use of ICD-10 data (over ICD-9 data) in the main analysis. Despite the limitations of these ICD-9 codes, the potential presence of “encephalopathy, not elsewhere classified” (a subcode under ICD-9 348), “altered consciousness” (a subcode under ICD-9 780), and “signs and symptoms involving cognition” (a subcode under ICD-9 799) would be consistent with the main findings from the ICD-10 data. Further, “fever and other physiologic disturbances of temperature regulation”, “asphyxia and hypoxemia”, and “respiratory arrest” would be consistent with severe COVID-19.

Finally, there was a significantly lower proportion of patients with “other and ill-defined cerebrovascular disease” (ICD-9 437:  $RDD_{after}=-42\%$ ) among patients with severe disease in the period after admission date. However, we must interpret these findings with great caution given the limitations of the ICD-9 data and the inconsistency with the larger sample size of the ICD-10 data.

**eTable 1. 4CE network of multinational healthcare systems.**

| Country                 | Healthcare System                                                                   | City              | Affiliated Hospitals | Beds   | Inpatient discharges/year | Obfuscation on small count mask threshold (e.g., <10) | Obfuscation blurring range if used (e.g., +/-3) |
|-------------------------|-------------------------------------------------------------------------------------|-------------------|----------------------|--------|---------------------------|-------------------------------------------------------|-------------------------------------------------|
| France                  | Assistance Publique - Hôpitaux de Paris                                             | Paris             | 39                   | 20,098 | 1,375,538                 | <3                                                    | none                                            |
|                         | Bordeaux University Hospital                                                        | Bordeaux          | 3                    | 2,676  | 130,033                   | <3                                                    | none                                            |
| Germany                 | Erlangen University Hospital                                                        | Erlangen          | 1                    | 1,400  | 65,000                    | <5                                                    | none                                            |
|                         | Medical Center, University of Freiburg                                              | Freiburg          | 1                    | 1,660  | 71,500                    | <4                                                    | none                                            |
|                         | University Medicine Mannheim                                                        | Mannheim          | 1                    | 1,352  | 50,748                    | <3                                                    | none                                            |
| Italy                   | ICSM Pavia Hospital                                                                 | Pavia             | 1                    | 426    | 8,616                     | none                                                  | none                                            |
|                         | ICSM Lumezzane/Brescia Hospitals                                                    | Lumezzane/Brescia | 1                    | 149    | 1,296                     | none                                                  | none                                            |
|                         | ICSM Milano Hospital                                                                | Milan             | 1                    | 200    | 2,432                     | none                                                  | none                                            |
|                         | Policlinico di Milano                                                               | Milan             | 1                    | 900    | 40,000                    | <5                                                    | none                                            |
|                         | ASST Papa Giovanni XXIII Bergamo                                                    | Bergamo           | 1                    | 1,080  | 45,000                    | <=5                                                   | none                                            |
|                         | University Magna Graecia of Catanzaro & Mater Domini University Hospital, Catanzaro | Catanzaro         | 1                    | 210    | 11,987                    | none                                                  | none                                            |
| Singapore               | ASST della provincia di Pavia                                                       | Pavia             | 7                    | 958    | 29,103                    | none                                                  | none                                            |
| Singapore               | National University Hospital                                                        | Singapore         | 1                    | 1,556  | 100,977                   | none                                                  | none                                            |
| Spain                   | Hospital Universitario 12 de Octubre                                                | Madrid            | 1                    | 1,256  | 45,035                    | <10                                                   | none                                            |
| USA                     | Beth Israel Deaconess Medical Center                                                | Boston, MA        | 1                    | 673    | 40,752                    | <10                                                   | +/-3                                            |
|                         | University of Kansas Medical Center                                                 | Kansas City, KS   | 1                    | 794    | 54,659                    | <=10                                                  | none                                            |
|                         | Mass General Brigham (Partners Healthcare)                                          | Boston, MA        | 10                   | 3,418  | 163,521                   | <10                                                   | +/-10                                           |
|                         | Medical University of South Carolina                                                | Charleston, SC    | 8                    | 1,600  | 55,664                    | <15                                                   | none                                            |
|                         | University of Pennsylvania                                                          | Philadelphia, PA  | 5                    | 2,469  | 118,188                   | <10                                                   | none                                            |
|                         | University of California, LA                                                        | Los Angeles, CA   | 2                    | 786    | 40,526                    | <10                                                   | none                                            |
|                         | University of Michigan                                                              | Ann Arbor, MI     | 3                    | 1,000  | 49,008                    | none                                                  | none                                            |
|                         | UT Southwestern Medical Center                                                      | Dallas, TX        | 1                    | 608    | 26,905                    | <6                                                    | none                                            |
|                         | Northwestern University                                                             | Chicago, IL       | 10                   | 2,234  | 103,279                   | none                                                  | none                                            |
|                         | University of Pittsburgh / UPMC                                                     | Pittsburgh, PA    | 39                   | 8,085  | 369,300                   | none                                                  | none                                            |
|                         | Medical College of Wisconsin                                                        | Milwaukee, WI     | 3                    | 876    | 44,655                    | <11                                                   | none                                            |
|                         | Wake Forest School of Medicine & Brenner Children's Hospital                        | Winston Salem, NC | 5                    | 1,510  | 67,541                    | none                                                  | None                                            |
|                         | St. Luke's University Health Network                                                | Bethlehem, PA     | 12                   | 1700   | 75,000                    | none                                                  | none                                            |
|                         | University of Kentucky                                                              | Lexington, KY     | 3                    | 881    | 45,714                    | none                                                  | none                                            |
| Riverside Health System | Newport News, VA                                                                    | 5                 | 670                  | 30,000 | none                      | none                                                  |                                                 |

|  |                   |  |            |               |                  |     |      |
|--|-------------------|--|------------|---------------|------------------|-----|------|
|  | VA North Atlantic |  | 49         | 3594          | 151075           | <11 | none |
|  | VA Southwest      |  | 29         | 3115          | 156315           | <11 | none |
|  | VA Midwest        |  | 39         | 2686          | 145468           | <11 | none |
|  | VA Continental    |  | 24         | 2110          | 113260           | <11 | none |
|  | VA Pacific        |  | 29         | 2296          | 114569           | <11 | none |
|  |                   |  | <b>338</b> | <b>75,026</b> | <b>3,942,664</b> |     |      |

Note: When aggregating the summary statistics at a site, counts below a certain obfuscation threshold (see healthcare system-specific obfuscation parameters) are masked as 0 to preserve system-specific privacy and to reduce the risk of patient re-identification.

**eTable 2. Neurological disease categories, corresponding ICD-9 codes, and their descriptions for the exploratory analysis.**

| <b>Disease Category</b> | <b>ICD-9</b> | <b>ICD-9 Description</b>                                        |
|-------------------------|--------------|-----------------------------------------------------------------|
| Muscle                  | 040          | Other bacterial diseases                                        |
| Psychiatric             | 298          | Other nonorganic psychosis                                      |
| Headache                | 307          | Special symptoms or syndromes, not elsewhere classified         |
| Inflammatory            | 320          | Bacterial meningitis                                            |
| Inflammatory            | 321          | Meningitis due to other organisms                               |
| Inflammatory            | 322          | Meningitis of unspecified cause                                 |
| Inflammatory            | 323          | Encephalitis, myelitis, and encephalomyelitis                   |
| Other                   | 330          | Cerebral degenerations usually manifest in childhood            |
| Other                   | 331          | Other cerebral degenerations                                    |
| Headache                | 339          | Other headache syndromes                                        |
| Seizure                 | 345          | Epilepsy and recurrent seizures                                 |
| Other                   | 348          | Other conditions of brain                                       |
| Neuropathy              | 357          | Inflammatory and toxic neuropathy                               |
| Muscle                  | 359          | Muscular dystrophies and other myopathies                       |
| Vision                  | 369          | Blindness and low vision                                        |
| Vascular                | 430          | Subarachnoid hemorrhage                                         |
| Vascular                | 431          | Intracerebral hemorrhage                                        |
| Vascular                | 432          | Other and unspecified intracranial hemorrhage                   |
| Vascular                | 435          | Transient cerebral ischemia                                     |
| Vascular                | 436          | Acute, but ill-defined cerebrovascular disease                  |
| Vascular                | 437          | Other and ill-defined cerebrovascular disease                   |
| Muscle                  | 728          | Disorders of muscle, ligament, and fascia                       |
| Muscle                  | 729          | Other disorders of soft tissues                                 |
| Other                   | 780          | General symptoms                                                |
| Neuropathy              | 781          | Symptoms involving nervous and musculoskeletal systems          |
| Headache                | 784          | Symptoms involving head and neck                                |
| Consciousness           | 797          | Senility without mention of psychosis                           |
| Consciousness           | 799          | Other ill-defined and unknown causes of morbidity and mortality |
| Vision/smell/taste      | V41          | Problems with special senses and other special functions        |

We note that for the four 3-character neurological ICD-9 codes that did not have a one-to-one mapping to corresponding ICD-10 codes, we manually grouped them into different neurological groups:

V41: Problems with special senses and other special functions (Vision/smell/taste)

437: Other and ill-defined cerebrovascular disease (Vascular)

780: General symptoms (Other)

781: Symptoms involving nervous and musculoskeletal systems (Other)

**eTable 3. Statistically significant associations of neurological conditions (ICD-9 codes) after admission and severe disease status ( $p_{FDR} < 0.05$ ).**

| Neurological Conditions (ICD-9 Code)                                  | LOE <sup>a</sup> | RRD <sup>b</sup><br>(%) | RRD<br>95% CI (%) | $p_{FDR}$ |
|-----------------------------------------------------------------------|------------------|-------------------------|-------------------|-----------|
| General symptoms (780) <sup>c</sup>                                   | 0.41             | 33                      | (24, 42)          | 6.40E-14  |
| Other and ill-defined cerebrovascular disease (437)                   | -0.76            | -41                     | (-60, -14)        | 0.022     |
| Other conditions of brain (348)                                       | 0.63             | 55                      | (37, 74)          | 1.70E-08  |
| Other ill-defined and unknown causes of morbidity and mortality (799) | 0.5              | 42                      | (32, 53)          | 2.70E-15  |

<sup>a</sup> The [results](https://github.com/covidclinical/Phase1.1NeuroRCode/tree/master/results) directory of the project online data repository (<https://github.com/covidclinical/Phase1.1NeuroRCode/tree/master/results>) show the  $\log_2$  value of enrichment (LOE), 95% confidence intervals, and  $p$  values for *all* neurological ICD-codes adjusted for multiple hypothesis testing.

<sup>b</sup> *RRD: Relative Risk Difference = Observed relative risk - 1.*

<sup>c</sup> ICD-9 780 includes “alteration of consciousness”.



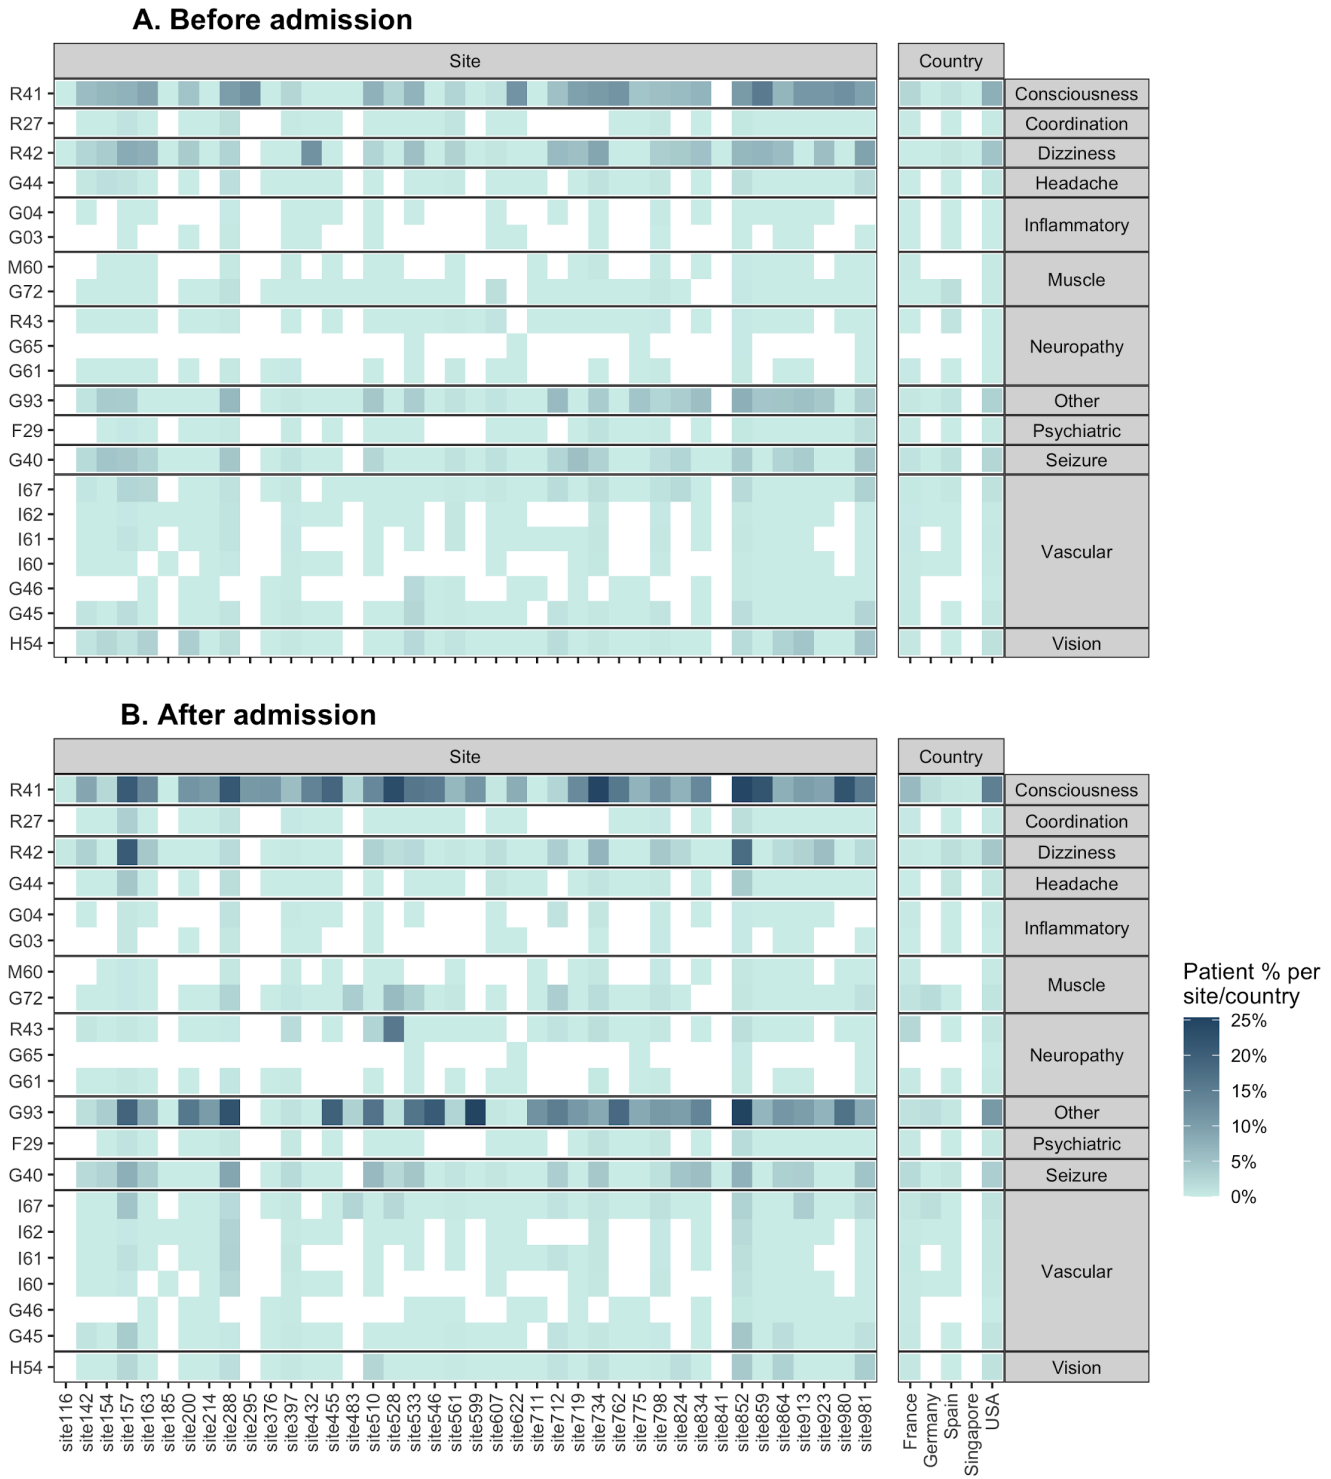

**eFigure 1. Prevalence of each ICD-10 code by site and country before and after admission date, supplementing Fig. 3A. Sites refer to the contributing healthcare systems.**

### A. US sites

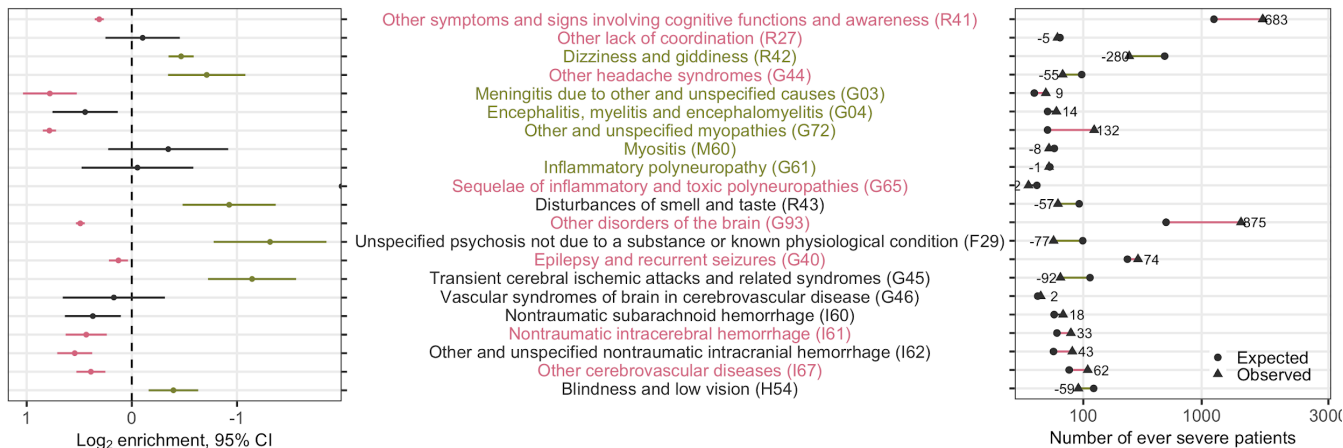

### B. Non-US sites

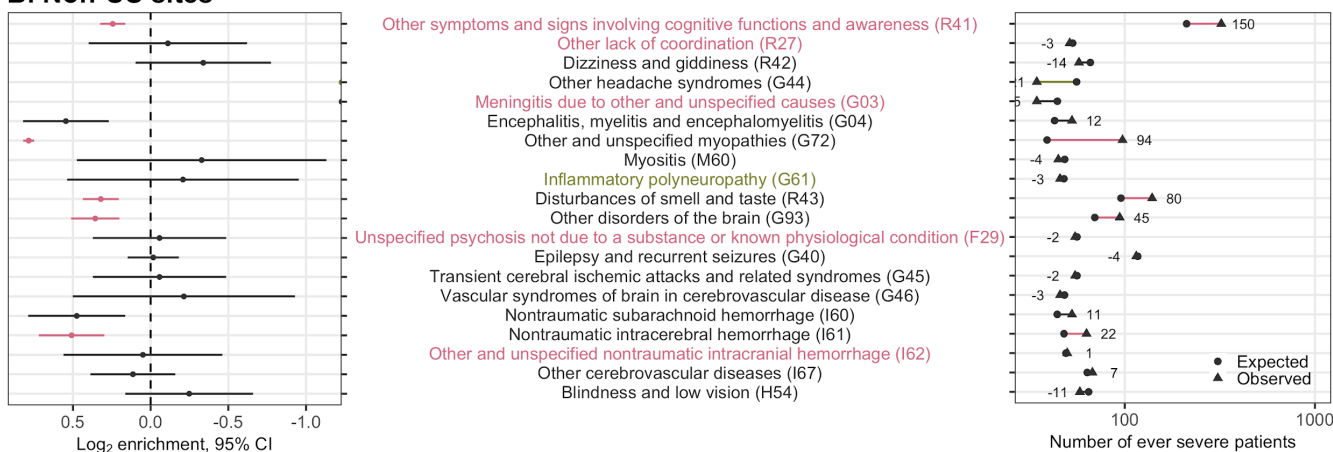

**eFigure 2. Prevalence of ICD-10 neurological codes among ever-severe cases, grouped by US sites and non-US sites. Sites refer to the contributing healthcare systems.**

Log<sub>2</sub> enrichment (LOE) and 95% confidence interval for each ICD-10 code (left) and the absolute difference between the observed (▲) and expected (●) number of severe cases (right) after admission. A purple positive LOE value for an ICD-9 code indicates a statistically significantly higher proportion of severe cases with the given ICD-10 code when compared to the never-severe cases. Conversely, a green negative LOE value indicates a statistically significantly lower proportion of severe cases with the given ICD-10 code compared to the never-severe cases. Neurological ICD-10 codes are ordered based on the expected number of severe cases after admission date across all sites. The results are generally consistent between the US sites and the non-US sites, except for the following: (1) ICD-10 code R43 (Disturbances of smell and taste) displays opposite directions between the US sites (higher proportion of severe cases with R43) and the non-US sites (lower proportion of severe cases with R43); (2) The US sites have several significant findings that are not significant among the non-US sites, largely due to the smaller number of sites outside the US. Overall, the findings from the subgroup analyses between US and non-US sites are consistent with the findings from the pooled analysis (Fig. 4, main text).

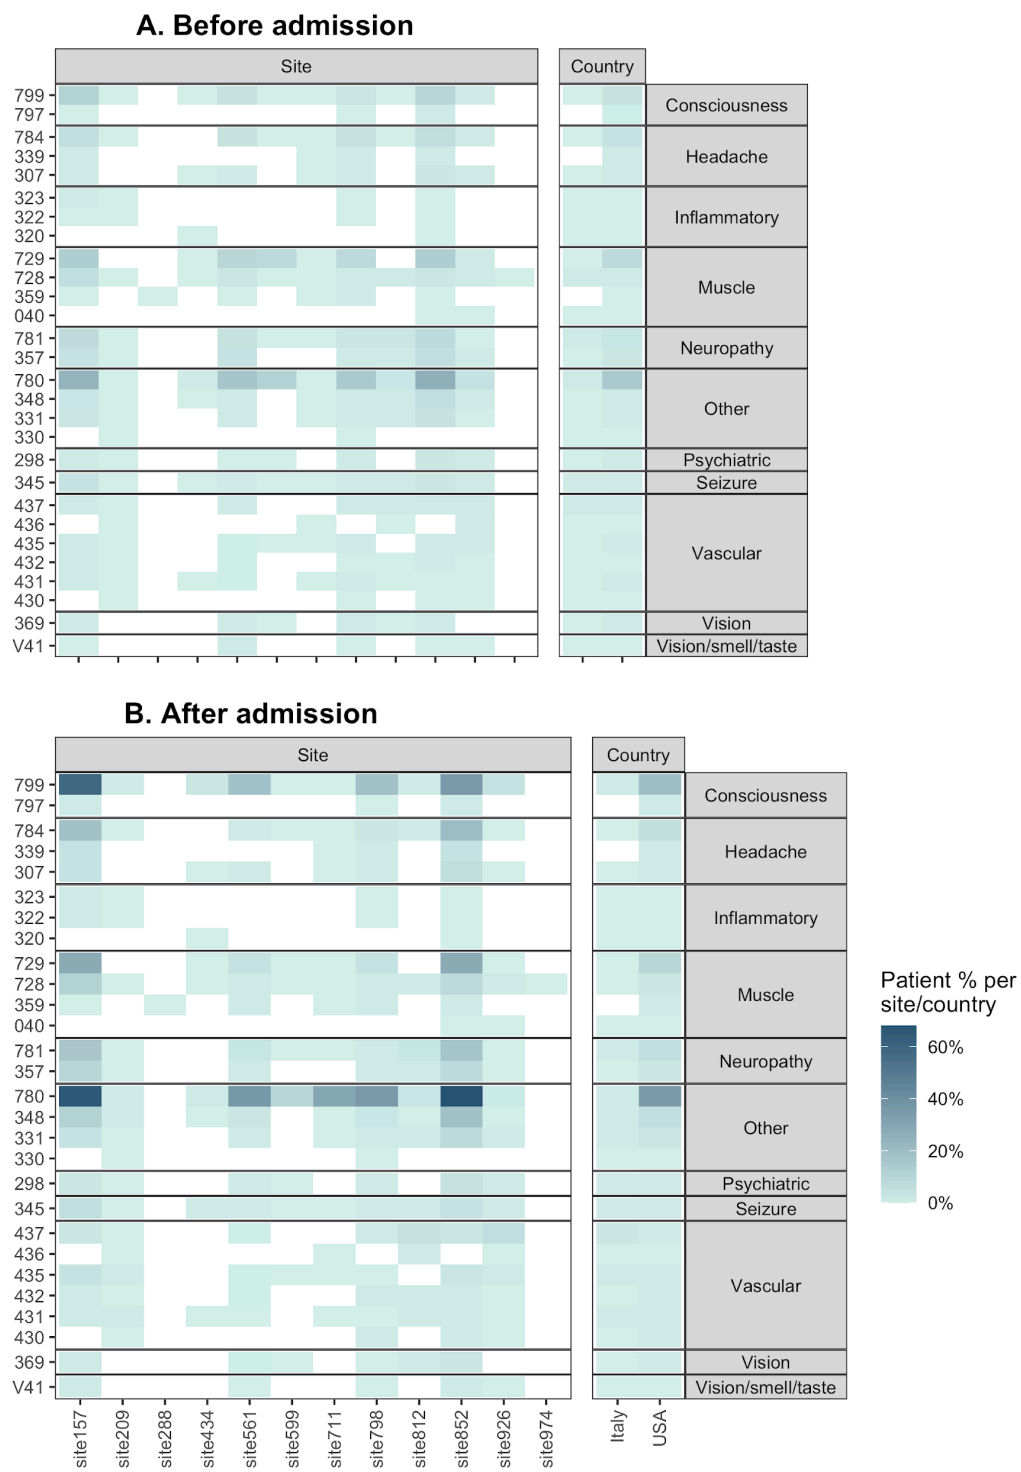

**eFigure 3. Prevalence of each ICD-9 code by site and country before and after admission date. Sites refer to the contributing healthcare systems.**

A

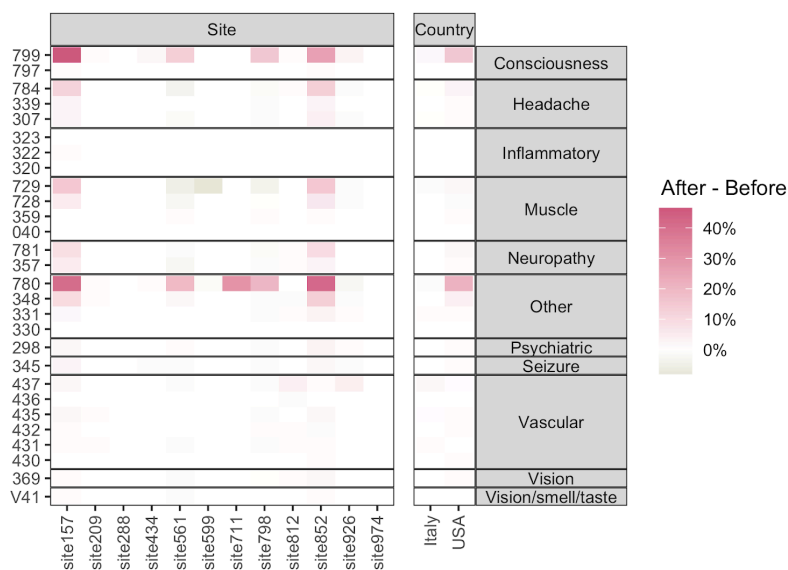

B

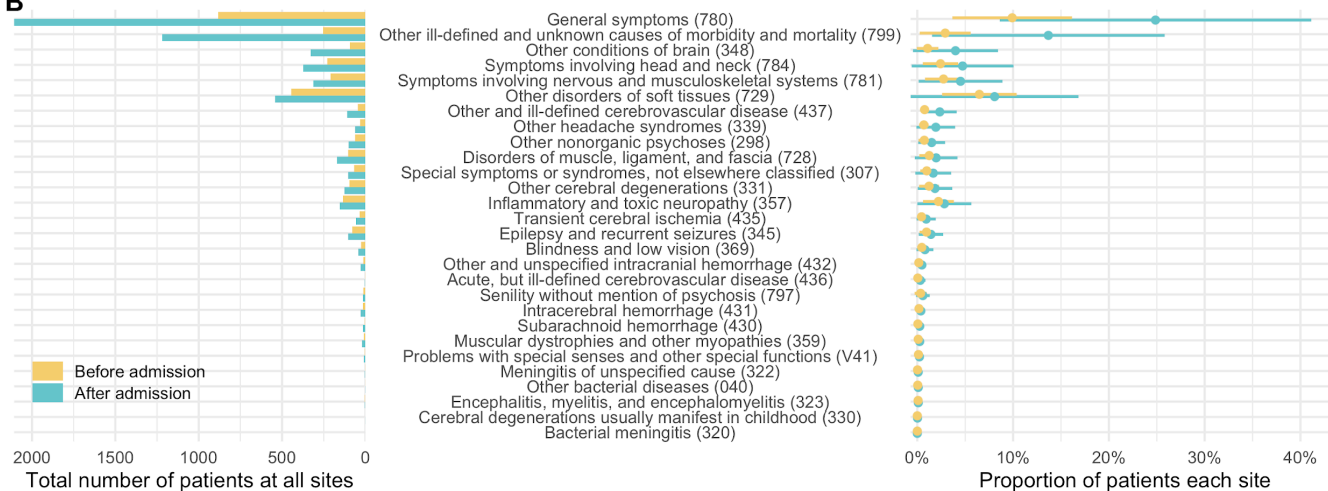

**eFigure 4. Prevalence of neurological phenotypes among all patients by ICD-9 code.** Sites refer to the contributing healthcare systems.

(A) Difference in prevalence of each neurological ICD-9 code by site and country, calculated as after admission date - before admission date (Eq. 2). The absolute values of prevalence are displayed in eFig. 3. (B) Per ICD-9 code, total counts of patients at all sites (left) and average proportion of patients (right) before and after admission date. Mean prevalence estimates across sites are shown as circles and their 95% confidence intervals as bars. ICD-9 codes are ordered based on the mean prevalence difference between before and after admission date.

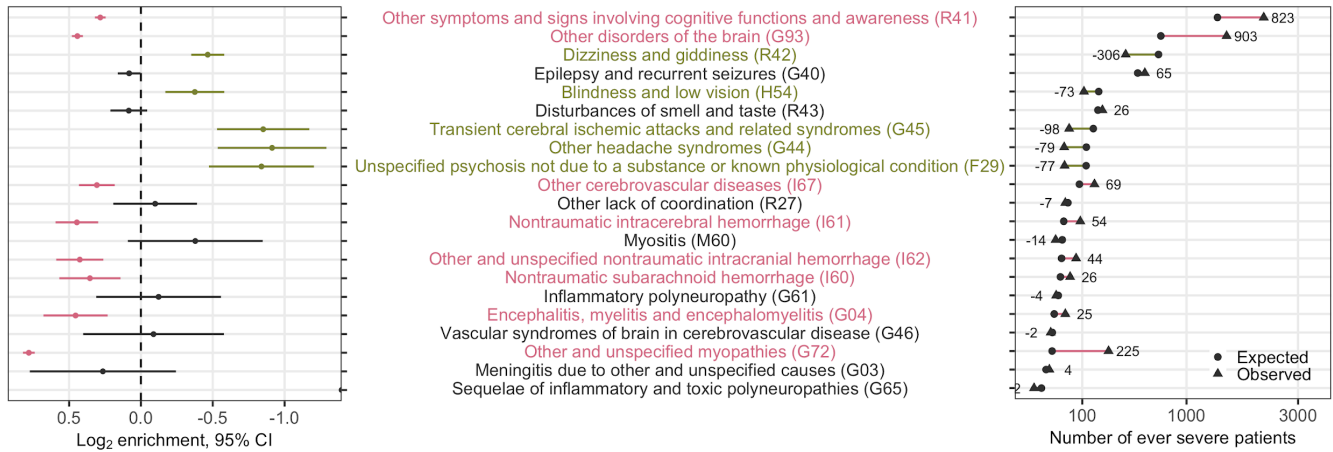

**eFigure 5. Prevalence of ICD-9 neurological codes among ever-severe cases. Sites refer to the contributing healthcare systems.**

Log<sub>2</sub> enrichment (LOE) and 95% confidence interval for each ICD-9 code (left) and the absolute difference between the observed (▲) and expected (●) number of severe cases (right) after admission. A **purple** positive LOE value for an ICD-9 code indicates a statistically significantly higher proportion of severe cases with the given ICD-9 code when compared to the never-severe cases. Conversely, a **green** negative LOE value indicates a statistically significantly lower proportion of severe cases with the given ICD-9 code compared to the never-severe cases. Neurological ICD-9 codes are ordered based on the expected number of severe cases after admission date.
